# Supplementary material for: Shared Gene Expression Between Multiple Sclerosis and Ischemic Stroke
Source: Front Genet. 2019 Feb 11;9:598. doi: 10.3389/fgene.2018.00598 (PMC6379658; doi:10.3389/fgene.2018.00598)
Supplement: Supplementary file 4 [file Table_4.XLSX]

## Sheet: Sheet1
Supplementary Table 4: The significant pathways of IS from 4 pathways datasets.
Pathway ID	Description	C	O	E	R	p-value	FDR
KEGG
hsa04650	Natural killer cell mediated cytotoxicity - Homo sapiens (human)	135	16	6.87	2.33	0.0013	0.357
hsa05223	Non-small cell lung cancer - Homo sapiens (human)	56	8	2.85	2.81	0.00692	0.429
hsa01521	EGFR tyrosine kinase inhibitor resistance - Homo sapiens (human)	81	10	4.12	2.43	0.00765	0.429
hsa04722	Neurotrophin signaling pathway - Homo sapiens (human)	121	13	6.16	2.11	0.00827	0.429
hsa04530	Tight junction - Homo sapiens (human)	139	14	7.07	1.98	0.0109	0.429
hsa05146	Amoebiasis - Homo sapiens (human)	100	11	5.09	2.16	0.0123	0.429
hsa04960	Aldosterone-regulated sodium reabsorption - Homo sapiens (human)	39	6	1.98	3.02	0.0131	0.429
hsa04012	ErbB signaling pathway - Homo sapiens (human)	88	10	4.48	2.23	0.0134	0.429
hsa04978	Mineral absorption - Homo sapiens (human)	52	7	2.65	2.65	0.0154	0.429
hsa04670	Leukocyte transendothelial migration - Homo sapiens (human)	118	12	6	2	0.0165	0.429
hsa05214	Glioma - Homo sapiens (human)	66	8	3.36	2.38	0.0181	0.429
hsa00480	Glutathione metabolism - Homo sapiens (human)	54	7	2.75	2.55	0.0187	0.429
hsa04130	SNARE interactions in vesicular transport - Homo sapiens (human)	34	5	1.73	2.89	0.0273	0.477
hsa04072	Phospholipase D signaling pathway - Homo sapiens (human)	144	13	7.33	1.77	0.0312	0.477
hsa04933	AGE-RAGE signaling pathway in diabetic complications - Homo sapiens (human)	101	10	5.14	1.95	0.0321	0.477
hsa05161	Hepatitis B - Homo sapiens (human)	146	13	7.43	1.75	0.0344	0.477
hsa04360	Axon guidance - Homo sapiens (human)	177	15	9	1.67	0.0355	0.477
hsa05144	Malaria - Homo sapiens (human)	49	6	2.49	2.41	0.0367	0.477
hsa05032	Morphine addiction - Homo sapiens (human)	91	9	4.63	1.94	0.0411	0.477
hsa04620	Toll-like receptor signaling pathway - Homo sapiens (human)	106	10	5.39	1.85	0.0426	0.477
hsa04658	Th1 and Th2 cell differentiation - Homo sapiens (human)	92	9	4.68	1.92	0.0436	0.477
hsa00970	Aminoacyl-tRNA biosynthesis - Homo sapiens (human)	66	7	3.36	2.08	0.0493	0.477
PANTHER
P00012	Cadherin signaling pathway	153	22	8.8	2.5	3.34e-05	0.00251
P00057	Wnt signaling pathway	294	31	16.91	1.83	0.000363	0.0136
P00044	Nicotinic acetylcholine receptor signaling pathway	93	10	5.35	1.87	0.038	0.624
P00048	PI3 kinase pathway	47	6	2.7	2.22	0.0497	0.624
REACTOME
R-HSA-5655302	Signaling by FGFR1 in disease	38	8	1.91	4.2	0.000489	0.245
R-HSA-196854	Metabolism of vitamins and cofactors	176	19	8.83	2.15	0.00131	0.245
R-HSA-379724	tRNA Aminoacylation	45	8	2.26	3.54	0.00158	0.245
R-HSA-8876198	RAB GEFs exchange GTP for GDP on RABs	90	12	4.51	2.66	0.00172	0.245
R-HSA-198933	Immunoregulatory interactions between a Lymphoid and a non-Lymphoid cell	132	15	6.62	2.27	0.00249	0.245
R-HSA-1236382	Constitutive Signaling by Ligand-Responsive EGFR Cancer Variants	20	5	1	4.98	0.00258	0.245
R-HSA-1643713	Signaling by EGFR in Cancer	20	5	1	4.98	0.00258	0.245
R-HSA-5637815	Signaling by Ligand-Responsive EGFR Variants in Cancer	20	5	1	4.98	0.00258	0.245
R-HSA-5654736	Signaling by FGFR1	50	8	2.51	3.19	0.00317	0.245
R-HSA-5654689	PI-3K cascade:FGFR1	21	5	1.05	4.75	0.00325	0.245
R-HSA-5654741	Signaling by FGFR3	40	7	2.01	3.49	0.00338	0.245
R-HSA-1839124	FGFR1 mutant receptor activation	31	6	1.56	3.86	0.0039	0.245
R-HSA-5654687	Downstream signaling of activated FGFR1	31	6	1.56	3.86	0.0039	0.245
R-HSA-5654743	Signaling by FGFR4	41	7	2.06	3.4	0.0039	0.245
R-HSA-8866654	E3 ubiquitin ligases ubiquitinate target proteins	42	7	2.11	3.32	0.00449	0.263
R-HSA-379726	Mitochondrial tRNA aminoacylation	23	5	1.15	4.33	0.00494	0.265
R-HSA-6814122	Cooperation of PDCL (PhLP1) and TRiC/CCT in G-protein beta folding	43	7	2.16	3.25	0.00513	0.265
R-HSA-8873719	RAB geranylgeranylation	66	9	3.31	2.72	0.00541	0.265
R-HSA-5654708	Downstream signaling of activated FGFR3	25	5	1.25	3.99	0.00718	0.333
R-HSA-111885	Opioid Signalling	85	10	4.26	2.35	0.00984	0.371
R-HSA-180024	DARPP-32 events	27	5	1.35	3.69	0.0101	0.371
R-HSA-5654716	Downstream signaling of activated FGFR4	27	5	1.35	3.69	0.0101	0.371
R-HSA-1660499	Synthesis of PIPs at the plasma membrane	49	7	2.46	2.85	0.0106	0.371
R-HSA-5693532	DNA Double-Strand Break Repair	169	16	8.48	1.89	0.0108	0.371
R-HSA-3299685	Detoxification of Reactive Oxygen Species	38	6	1.91	3.15	0.0109	0.371
R-HSA-1296071	Potassium Channels	100	11	5.02	2.19	0.0113	0.371
R-HSA-1483191	Synthesis of PC	28	5	1.4	3.56	0.0117	0.371
R-HSA-8852135	Protein ubiquitination	62	8	3.11	2.57	0.0118	0.371
R-HSA-1226099	Signaling by FGFR in disease	63	8	3.16	2.53	0.013	0.393
R-HSA-977444	GABA B receptor activation	40	6	2.01	2.99	0.0139	0.395
R-HSA-991365	Activation of GABAB receptors	40	6	2.01	2.99	0.0139	0.395
R-HSA-6806667	Metabolism of fat-soluble vitamins	52	7	2.61	2.68	0.0145	0.398
R-HSA-2219530	Constitutive Signaling by Aberrant PI3K in Cancer	65	8	3.26	2.45	0.0155	0.402
R-HSA-5654696	Downstream signaling of activated FGFR2	30	5	1.5	3.32	0.0157	0.402
R-HSA-5654720	PI-3K cascade:FGFR4	20	4	1	3.99	0.016	0.402
R-HSA-1296065	Inwardly rectifying K+ channels	31	5	1.56	3.22	0.018	0.42
R-HSA-6811442	Intra-Golgi and retrograde Golgi-to-ER traffic	195	17	9.78	1.74	0.0187	0.42
R-HSA-445144	Signal transduction by L1	21	4	1.05	3.8	0.019	0.42
R-HSA-199977	ER to Golgi Anterograde Transport	151	14	7.57	1.85	0.0194	0.42
R-HSA-975634	Retinoid metabolism and transport	43	6	2.16	2.78	0.0195	0.42
R-HSA-948021	Transport to the Golgi and subsequent modification	182	16	9.13	1.75	0.0206	0.42
R-HSA-6806834	Signaling by MET	82	9	4.11	2.19	0.0212	0.42
R-HSA-6807878	COPI-mediated anterograde transport	96	10	4.82	2.08	0.0218	0.42
R-HSA-5655332	Signaling by FGFR3 in disease	22	4	1.1	3.62	0.0223	0.42
R-HSA-8853338	Signaling by FGFR3 point mutants in cancer	22	4	1.1	3.62	0.0223	0.42
R-HSA-196849	Metabolism of water-soluble vitamins and cofactors	125	12	6.27	1.91	0.0229	0.42
R-HSA-5654726	Negative regulation of FGFR1 signaling	33	5	1.66	3.02	0.0231	0.42
R-HSA-5693538	Homology Directed Repair	140	13	7.02	1.85	0.0234	0.42
R-HSA-6811438	Intra-Golgi traffic	45	6	2.26	2.66	0.0239	0.42
R-HSA-1500931	Cell-Cell communication	141	13	7.07	1.84	0.0247	0.42
R-HSA-2187338	Visual phototransduction	98	10	4.92	2.03	0.0248	0.42
R-HSA-6811434	COPI-dependent Golgi-to-ER retrograde traffic	98	10	4.92	2.03	0.0248	0.42
R-HSA-373753	Nephrin interactions	23	4	1.15	3.47	0.0259	0.423
R-HSA-5654695	PI-3K cascade:FGFR2	23	4	1.15	3.47	0.0259	0.423
R-HSA-1483257	Phospholipid metabolism	205	17	10.28	1.65	0.0287	0.459
R-HSA-6811558	PI5P, PP2A and IER3 Regulate PI3K/AKT Signaling	87	9	4.36	2.06	0.0299	0.47
R-HSA-1296041	Activation of G protein gated Potassium channels	25	4	1.25	3.19	0.0343	0.511
R-HSA-1296059	G protein gated Potassium channels	25	4	1.25	3.19	0.0343	0.511
R-HSA-997272	Inhibition of voltage gated Ca2+ channels via Gbeta/gamma subunits	25	4	1.25	3.19	0.0343	0.511
R-HSA-2219528	PI3K/AKT Signaling in Cancer	90	9	4.51	1.99	0.0361	0.528
R-HSA-5693567	HDR through Homologous Recombination (HR) or Single Strand Annealing (SSA)	134	12	6.72	1.79	0.0366	0.528
R-HSA-3000178	ECM proteoglycans	77	8	3.86	2.07	0.0385	0.547
R-HSA-1483255	PI Metabolism	78	8	3.91	2.04	0.0411	0.561
R-HSA-1227986	Signaling by ERBB2	51	6	2.56	2.35	0.0412	0.561
R-HSA-913531	Interferon Signaling	199	16	9.98	1.6	0.0422	0.561
R-HSA-877300	Interferon gamma signaling	93	9	4.67	1.93	0.0432	0.561
R-HSA-174800	Chylomicron-mediated lipid transport	27	4	1.35	2.95	0.044	0.561
R-HSA-380994	ATF4 activates genes	27	4	1.35	2.95	0.044	0.561
R-HSA-6783589	Interleukin-6 family signaling	27	4	1.35	2.95	0.044	0.561
R-HSA-199418	Negative regulation of the PI3K/AKT network	94	9	4.72	1.91	0.0458	0.575
Wiki Pathways
WP3286	Copper homeostasis	54	10	2.99	3.34	0.000636	0.0838
WP3529	Zinc homeostasis	37	8	2.05	3.9	0.000762	0.0838
WP2865	IL1 and megakaryocytes in obesity	25	5	1.39	3.61	0.0107	0.689
WP2203	Thymic Stromal LymphoPoietin (TSLP) Signaling Pathway	47	7	2.6	2.69	0.0139	0.689
WP2261	Signaling Pathways in Glioblastoma	83	10	4.6	2.17	0.0157	0.689
WP455	GPCRs, Class A Rhodopsin-like	258	22	14.3	1.54	0.0276	0.708
WP1584	Type II diabetes mellitus	22	4	1.22	3.28	0.0306	0.708
WP3599	Transcription factor regulation in adipogenesis	22	4	1.22	3.28	0.0306	0.708
WP716	Vitamin A and Carotenoid Metabolism	44	6	2.44	2.46	0.0329	0.708
WP1601	Fluoropyrimidine Activity	34	5	1.88	2.65	0.0375	0.708
WP313	Signaling of Hepatocyte Growth Factor Receptor	34	5	1.88	2.65	0.0375	0.708
WP35	G Protein Signaling Pathways	97	10	5.38	1.86	0.0412	0.708
WP244	Alpha 6 Beta 4 signaling pathway	35	5	1.94	2.58	0.0419	0.708
C: the number of reference genes in the category; O: the number of genes in the gene set and also in the category; E: expected number in the category; R: the ratio of enrichment; FDR: false discovery rate.
